# Supplementary material
Source: MDPI journal article supplement (https://www.mdpi.com/2311-5637/8/6/272)
Supplement: s1 [file s1]

**Supplementary material for the paper entitled:**

**Spray-dried nipa palm vinegar powder: Production and evaluation of physicochemical, nutritional, sensory, and storage aspects**

Wilawan Palachum, Wiyada Kwanhian Klangbud, and Yusuf Chisti

**Table S1.** The levels of the various factors in experimental design.

| Factor                                     | Levels | Coded level |     |     |
|--------------------------------------------|--------|-------------|-----|-----|
|                                            |        | −1          | 0   | 1   |
| $X_1$ , Air inlet temperature (°C)         | 3      | 150         | 170 | 190 |
| $X_2$ , Maltodextrin concentration (% w/v) | 2      | 15          | -   | 20  |

**Table S2.** The factor values used in producing the various powdered NPV products.

| Product | $X_1$ : Inlet temperature (°C) | $X_2$ : Maltodextrin concentration (%) |
|---------|--------------------------------|----------------------------------------|
| NPVp-1  | 150                            | 15                                     |
| NPVp-2  | 150                            | 20                                     |
| NPVp-3  | 170                            | 15                                     |
| NPVp-4  | 170                            | 20                                     |
| NPVp-5  | 190                            | 15                                     |
| NPVp-6  | 190                            | 20                                     |

**Table S3.** The constraints used in estimating the overall desirability.

| Variable                               | Target   | Lower<br>limit | Upper<br>limit | Weight | Importance<br>coefficient |
|----------------------------------------|----------|----------------|----------------|--------|---------------------------|
| <i>Input</i>                           |          |                |                |        |                           |
| Inlet temperature ( $T$ )              | In range | 150            | 190            | 1      | -                         |
| Maltodextrin<br>concentration ( $MD$ ) | In range | 15             | 20             | 1      | -                         |
| <i>Output</i>                          |          |                |                |        |                           |
| Product yield ( $Y$ )                  | Maximize | 46.73          | 58.32          | 1      | +++++                     |
| Bulk density ( $BD$ )                  | Maximize | 0.43           | 0.48           | 1      | +++++                     |
| Moisture content ( $MC$ )              | Minimize | 2.05           | 3.1            | 1      | +++++                     |
| Water activity ( $a_w$ )               | Minimize | 0.23           | 0.36           | 1      | +++++                     |

**Table S4.** The statistical models and comparison of predictions with the measured values.

| Attribute                       | Statistical model <sup>a</sup>                                                                                                              | Predicted<br>value <sup>b</sup> | Measured data<br>for NPVp-3 |
|---------------------------------|---------------------------------------------------------------------------------------------------------------------------------------------|---------------------------------|-----------------------------|
| <i>Y</i> (%)                    | $Q = 53.22 + 1.62T[1] + 2.73T[2] + 1.88MD - 0.41T[1] MD + 0.45T[2] MD$                                                                      | 53.62                           | $53.62 \pm 0.11$            |
| <i>BD</i> (g mL <sup>-1</sup> ) | $Q = 0.46 + 4.2 \times 10^{-3}T[1] + 1.2 \times 10^{-2}T[2] + 7.5 \times 10^{-3}MD - 2.5 \times 10^{-3}T[1] MD - 5.0 \times 10^{-3}T[2] MD$ | 0.47                            | $0.47 \pm 0.00$             |
| <i>MC</i> (% w/w)               | $Q = 2.73 + 7.8 \times 10^{-2}T[1] - 0.18T[2] + 0.30MD - 6.0 \times 10^{-2}T[1] MD + 0.17T[2] MD$                                           | 2.08                            | $2.08 \pm 0.04$             |
| <i>a<sub>w</sub></i> (-)        | $Q = 0.27 + 6.4 \times 10^{-2}T[1] - 3.0 \times 10^{-2}T[2] + 1.1 \times 10^{-2}MD + 1.4 \times 10^{-2}T[1] MD - 5.0 \times 10^{-3}T[2] MD$ | 0.23                            | $0.23 \pm 0.00$             |
| <i>TSS</i> (°Bx)                | $Q = 21.88 - 8.3 \times 10^{-2}T[1] - 3.3 \times 10^{-2}T[2] + 2.05MD + 0.25T[1] MD - 0.20T[2] MD$                                          | 20                              | $20.00 \pm 0.00$            |

*Y* (%), product yield; *BD* (g mL<sup>-1</sup>), bulk density; *MC* (% w/w), moisture content; *a<sub>w</sub>* (-), water activity; *TSS* (°Bx) total soluble solids.

<sup>a</sup> *Q* is the predicted response; *T* is the coded value of inlet air temperature; *T*[1] (= 0 at optimal temperature) is the first coefficient (the difference of level 1 from the overall average); *T*[2] (= 1 at optimal temperature) is the second coefficient (the difference of level 2 from the overall average); *MD* (= -1 at optimal concentration) is the coded value of maltodextrin concentration.

<sup>b</sup> Predicted for optimal conditions (*X*<sub>1</sub> = 170 °C, *X*<sub>2</sub> = 15% w/v).
